# Supplementary material
Source: Royal Society of Chemistry journal article supplement (doi:10.1039/d5fd00147a)
Supplement: d5fd00147a1.pdf [file d5fd00147a1.pdf]

# Ionophilicity and Transport Dynamics of Concentrated Electrolytes in Sub-Nanometre Graphite Confinement

Fulu Zhou, and Paola Carbone

## Supporting Information

### 1. Example of LAMMPS input file for the LiTFSI simulations

# LAMMPS input script

```
units          real
dimension      3
boundary       p p p
```

```
atom_style     full
bond_style     harmonic
angle_style    harmonic
dihedral_style charmm
```

##----- Force field -----##

```
pair_style     lj/cut/tip4p/long 1 2 1 1 0.1546 12.0
pair_modify    table 0
pair_modify    tabinner/disp 10
pair_modify    tail yes
kspace_style   ppm/tip4p 1.0e-4
comm_modify    cutoff 15.5
```

##----- Build configuration -----##

```
region        box block 0 50 -400 501 0 33
region        liq1 block 0 50 -105 -5 0 33
region        liq2 block 0 50 105 205 0 33
```

```
create_box    9 box &
              bond/types 5 &
              angle/types 8 &
              dihedral/types 6 &
              extra/bond/per/atom 4 &
              extra/angle/per/atom 12 &
              extra/dihedral/per/atom 30 &
              extra/special/per/atom 30 &
```

```
molecule water tip3p.mol offset 0 0 0 0 # this uses the TIP3P geometry
molecule TFSI TFSI.mol offset 3 1 1 0 0
```

create\_atoms 0 random 100 52802 liq1 mol TFSI 25894 overlap 1.0 maxtry 500  
create\_atoms 0 random 5388 34564 liq1 mol water 25367 overlap 1.0  
create\_atoms 3 random 100 90182 liq1 overlap 0.5 maxtry 500

create\_atoms 0 random 100 52802 liq2 mol TFSI 25894 overlap 1.0 maxtry 500  
create\_atoms 0 random 5388 34564 liq2 mol water 25367 overlap 1.0  
create\_atoms 3 random 100 90182 liq2 overlap 0.5 maxtry 500

read\_data channel.data add append offset 8 0 0 0  
read\_data channel.data add append offset 8 0 0 0 shift 0 0 22.5

bond\_coeff 1 450.0 0.9572 # O-H water  
bond\_coeff 2 493.0 1.466 # S-O TFSI  
bond\_coeff 3 257.1 1.752 # S-N TFSI  
bond\_coeff 4 248.9 1.782 # S-C TFSI  
bond\_coeff 5 363.8 1.344 # C-F TFSI

angle\_coeff 1 55.00 104.52 # H-O-H water  
angle\_coeff 2 45.30 121 # O-S-O TFSI  
angle\_coeff 3 43.09 107.06 # N-S-O TFSI  
angle\_coeff 4 109.72 119.18 # S-N-S TFSI  
angle\_coeff 5 39.42 103.12 # N-S-C TFSI  
angle\_coeff 6 81.22 109.67 # S-C-F TFSI  
angle\_coeff 7 41.28 108.48 # O-S-C TFSI  
angle\_coeff 8 71.26 107.16 # F-C-F TFSI

dihedral\_coeff 1 0.144000956 3 0 0 # f-C3-Sy-O  
dihedral\_coeff 2 0.49999283 3 180 0 # Sy-Ne-Sy-O  
dihedral\_coeff 3 6.799902008 3 180 0 # Sy-Ne-Sy-O  
dihedral\_coeff 4 0.144000956 3 0 0 # f-C3-Sy-Ne  
dihedral\_coeff 5 0.49999283 3 180 0 # Sy-Ne-Sy-C3  
dihedral\_coeff 6 6.799902008 3 180 0 # Sy-Ne-Sy-C3

##----- Set mass for atom -----##

mass 1 15.9994 # O\_h2o  
mass 2 1.008 # H  
mass 3 6.94100 # Li  
mass 4 16.00 # O\_TFSI  
mass 5 32.06 # S  
mass 6 14.01 # N  
mass 7 12.01 # C3  
mass 8 19.00 # F  
mass 9 12.0707 # C

##----- must change charges for TIP4P -----##

set type 1 charge -1.1128

```

set   type  2   charge 0.5564
set   type  3   charge 0.85
set   type  4   charge -0.466
set   type  5   charge 0.911
set   type  6   charge -0.598
set   type  7   charge 0.3165
set   type  8   charge -0.1405
set   type  9   charge 0

```

```

##----- Pair coeff -----##
##----- eps ----- sigma -----##

```

| pair_coeff | 1 | 1 | 0.1852      | 3.1589 #  | O  |
|------------|---|---|-------------|-----------|----|
| pair_coeff | 2 | 2 | 0           | 0 #       | H  |
| pair_coeff | 3 | 3 | 0.10399     | 1.4397 #  | Li |
| pair_coeff | 4 | 4 | 0.21        | 2.9599 #  | Ot |
| pair_coeff | 5 | 5 | 0.25        | 3.5636 #  | S  |
| pair_coeff | 6 | 6 | 0.17        | 3.25 #    | N  |
| pair_coeff | 7 | 7 | 0.1094      | 3.3997 #  | C3 |
| pair_coeff | 8 | 8 | 0.061       | 3.1182 #  | F  |
| pair_coeff | 9 | 9 | 0.0000      | 3.3997 #  | C  |
| pair_coeff | 1 | 2 | 0           | 1.57945 # | O  |
| pair_coeff | 1 | 3 | 0.16746     | 2.12 #    | O  |
| pair_coeff | 1 | 4 | 0.197210547 | 3.0594 #  | O  |
| pair_coeff | 1 | 5 | 0.215174348 | 3.36125 # | O  |
| pair_coeff | 1 | 6 | 0.177437313 | 3.20445 # | O  |
| pair_coeff | 1 | 7 | 0.142340718 | 3.2793 #  | O  |
| pair_coeff | 1 | 8 | 0.106288287 | 3.13855 # | O  |
| pair_coeff | 1 | 9 | 0.11434     | 3.275 #   | O  |
| pair_coeff | 2 | 3 | 0           | 0.71985 # | H  |

|            |    |   |   |             |         |   |    |
|------------|----|---|---|-------------|---------|---|----|
| pair_coeff |    | 2 | 4 | 0           | 1.47995 | # | H  |
| Ot         |    |   |   |             |         |   |    |
| pair_coeff |    | 2 | 5 | 0           | 1.7818  | # | H  |
| pair_coeff |    | 2 | 6 | 0           | 1.625   | # | H  |
| pair_coeff |    | 2 | 7 | 0           | 1.69985 | # | H  |
| C3         |    |   |   |             |         |   |    |
| pair_coeff |    | 2 | 8 | 0           | 1.5591  | # | H  |
| pair_coeff |    | 2 | 9 | 0           | 1.69985 | # | H  |
| C          |    |   |   |             |         |   |    |
| pair_coeff |    | 3 | 4 | 0.14777652  | 2.1998  | # | Li |
| Ot         |    |   |   |             |         |   |    |
| pair_coeff |    | 3 | 5 | 0.161237403 | 2.50165 | # |    |
| Li         | S  |   |   |             |         |   |    |
| pair_coeff |    | 3 | 6 | 0.132959768 | 2.34485 | # |    |
| Li         | N  |   |   |             |         |   |    |
| pair_coeff |    | 3 | 7 | 0.106660705 | 2.4197  | # | Li |
| C3         |    |   |   |             |         |   |    |
| pair_coeff |    | 3 | 8 | 0.079645402 | 2.27895 | # |    |
| Li         | F  |   |   |             |         |   |    |
| pair_coeff |    | 3 | 9 | 0.094513179 | 2.4197  | # | Li |
| C          |    |   |   |             |         |   |    |
| pair_coeff |    | 4 | 5 | 0.229128785 | 3.26175 | # |    |
| Ot         | S  |   |   |             |         |   |    |
| pair_coeff |    | 4 | 6 | 0.188944436 | 3.10495 | # |    |
| Ot         | N  |   |   |             |         |   |    |
| pair_coeff |    | 4 | 7 | 0.151571765 | 3.1798  | # | Ot |
| C3         |    |   |   |             |         |   |    |
| pair_coeff |    | 4 | 8 | 0.113181271 | 3.03905 | # |    |
| Ot         | F  |   |   |             |         |   |    |
| pair_coeff |    | 4 | 9 | 0.134309344 | 3.1798  | # | Ot |
| C          |    |   |   |             |         |   |    |
| pair_coeff |    | 5 | 6 | 0.206155281 | 3.4068  | # | S  |
| N          |    |   |   |             |         |   |    |
| pair_coeff |    | 5 | 7 | 0.165378354 | 3.48165 | # |    |
| S          | C3 |   |   |             |         |   |    |
| pair_coeff |    | 5 | 8 | 0.12349089  | 3.3409  | # | S  |
| F          |    |   |   |             |         |   |    |
| pair_coeff |    | 5 | 9 | 0.146543509 | 3.48165 | # |    |
| S          | C  |   |   |             |         |   |    |
| pair_coeff |    | 6 | 7 | 0.136374484 | 3.32485 | # |    |
| N          | C3 |   |   |             |         |   |    |
| pair_coeff |    | 6 | 8 | 0.101833197 | 3.1841  | # | N  |
| F          |    |   |   |             |         |   |    |

|            |   |   |   |             |          |    |
|------------|---|---|---|-------------|----------|----|
| pair_coeff |   | 6 | 9 | 0.120842873 | 3.32485  | #  |
| N          | C |   |   |             |          |    |
| pair_coeff |   | 7 | 8 | 0.081690881 | 3.25895  | #  |
| C3         | F |   |   |             |          |    |
| pair_coeff |   | 7 | 9 | 0.096940497 | 3.3997 # | C3 |
| C          |   |   |   |             |          |    |
| pair_coeff |   | 8 | 9 | 0.072387154 | 3.25895  | #  |
| F          | C |   |   |             |          |    |

##----- Set group name -----##

```

group      Ox type 1
group      Hy type 2
group      Li type 3
group      Ot type 4
group      S  type 5
group      N  type 6
group      C3 type 7
group      F  type 8
group      gra type 9

group      H2O type 1 2
group      TFSI type 4 5 6 7 8
group      ele type 1 2 3 4 5 6 7 8

```

##----- Energy minimization -----##

```

thermo      10
fix         freeze gra setforce 0.0 0.0 0.0
minimize    1.0e-4 1.0e-6 100 1000

```

write\_data LiTFSIchannel1m.data

# ----- Initi Vel -----##

```

velocity ele create 300 944588317
velocity ele zero linear
velocity ele zero angular

```

```

# ----- Initi Vel -----##

velocity ele create 300 944588317
velocity ele zero linear
velocity ele zero angular

##----- Run NVT at 298.15K correct every 200 timestep -----##
##----- shake to fix bond and angle -----##

region          channel block 0 50 0 100.6 10.2 22.5

variable Nh2o    equal count(H2O,channel)
variable Nli     equal count(Li,channel)
variable NOt     equal count(Ot,channel)
variable NS      equal count(S,channel)
variable NN      equal count(N,channel)
variable NC3     equal count(C3,channel)
variable NF      equal count(F,channel)

variable NTFSI   equal count(TFSI,channel)

fix      myat1 all ave/time 10 100 1000 v_Nh2o file H2O.dat
fix      myat2 all ave/time 10 100 1000 v_Nli  file Nli.dat
fix      myat3 all ave/time 10 100 1000 v_NOt  file NOt.dat
fix      myat4 all ave/time 10 100 1000 v_NS   file NS.dat
fix      myat5 all ave/time 10 100 1000 v_NN   file NN.dat
fix      myat6 all ave/time 10 100 1000 v_NC3  file NC3.dat
fix      myat7 all ave/time 10 100 1000 v_NF   file NF.dat

timestep      2      #2fs
dump          mydmp all custom 1000 md.lammpstrj id type x y z
compute      eletemp ele temp

thermo       1000
thermo_style  custom step c_eletemp pe press v_Nh2o v_Nli v_NTFSI v_NOt v_NS
v_NN v_NC3 v_NF

fix          freeze gra setforce 0.0 0.0 0.0
fix          myshk H2O shake 1.0e-5 200 0 b 1 a 1
fix          mynvt ele nvt temp 298.15 298.15 400
#fix        mynvt2 gra nvt temp 0 0 400
fix          balance all balance 10000 1.05 shift y 10 1.05
fix          moment ele momentum 1 linear 1 1 1 rescale

restart      500000 restart/restart.*.equil
run          25000000 #50ns

```

write\_data LiTFSIchannel1M\_final.data nocoeff

```
## -----change the parameters for NaTFSI setup-----##
##
## mass 3 22.98977 # Na
##
##
## ##----- Pair coeff -----##
## ##----- eps ----- sigma -----##
##
## pair_coeff      1      1      0.1852      3.1589      #
##      O
## pair_coeff      2      2      0      0      #      H
##
## pair_coeff      3      3      0.3519      2.21737      #
##      Na
## pair_coeff      4      4      0.21      2.9599      #
##      Ot
## pair_coeff      5      5      0.25      3.5636      #
##      S
## pair_coeff      6      6      0.17      3.25      #      N
##
## pair_coeff      7      7      0.1094      3.3997      #
##      C3
## pair_coeff      8      8      0.061      3.1182      #
##      F
## pair_coeff      9      9      0.0      3.3997      #
##      C
##
## pair_coeff      1      2      0      1.57945      #
##      O      H
## pair_coeff      1      3      0.18962      2.60838
##      #      O      Na 2019-Madrid
## pair_coeff      1      4      0.197210547      3.0594      #
##      O      Ot
## pair_coeff      1      5      0.215174348      3.36125      #
##      O      S
## pair_coeff      1      6      0.177437313      3.20445
##      #      O      N
## pair_coeff      1      7      0.142340718      3.2793      #
##      O      C3
## pair_coeff      1      8      0.106288287      3.13855
##      #      O      F
## pair_coeff      1      9      0.11434      3.275
##      #      O      C      werder
##
```

|               |    |    |             |          |   |   |
|---------------|----|----|-------------|----------|---|---|
| ## pair_coeff | 2  | 3  | 0           | 1.108685 | # | H |
| Na            |    |    |             |          |   |   |
| ## pair_coeff | 2  | 4  | 0           | 1.47995  | # |   |
| H             | Ot |    |             |          |   |   |
| ## pair_coeff | 2  | 5  | 0           | 1.7818   | # |   |
| H             | S  |    |             |          |   |   |
| ## pair_coeff | 2  | 6  | 0           | 1.625    | # |   |
| H             | N  |    |             |          |   |   |
| ## pair_coeff | 2  | 7  | 0           | 1.69985  | # |   |
| H             | C3 |    |             |          |   |   |
| ## pair_coeff | 2  | 8  | 0           | 1.5591   | # |   |
| H             | F  |    |             |          |   |   |
| ## pair_coeff | 2  | 9  | 0           | 1.69985  | # |   |
| H             | C  |    |             |          |   |   |
| ##            |    |    |             |          |   |   |
| ## pair_coeff | 3  | 4  | 0.271843705 | 2.588635 | # |   |
| Na            | Ot |    |             |          |   |   |
| ## pair_coeff | 3  | 5  | 0.296605799 | 2.890485 | # |   |
| Na            | S  |    |             |          |   |   |
| ## pair_coeff | 3  | 6  | 0.244587408 | 2.733685 | # |   |
| Na            | N  |    |             |          |   |   |
| ## pair_coeff | 3  | 7  | 0.196208715 | 2.808535 | # |   |
| Na            | C3 |    |             |          |   |   |
| ## pair_coeff | 3  | 8  | 0.146512457 | 2.667785 | # |   |
| Na            | F  |    |             |          |   |   |
| ## pair_coeff | 3  | 9  | 0.173862618 | 2.808535 | # |   |
| Na            | C  |    |             |          |   |   |
| ##            |    |    |             |          |   |   |
| ## pair_coeff | 4  | 5  | 0.229128785 | 3.26175  |   |   |
| #             | Ot | S  |             |          |   |   |
| ## pair_coeff | 4  | 6  | 0.188944436 | 3.10495  |   |   |
| #             | Ot | N  |             |          |   |   |
| ## pair_coeff | 4  | 7  | 0.151571765 | 3.1798   | # |   |
| Ot            | C3 |    |             |          |   |   |
| ## pair_coeff | 4  | 8  | 0.113181271 | 3.03905  |   |   |
| #             | Ot | F  |             |          |   |   |
| ## pair_coeff | 4  | 9  | 0.134309344 | 3.1798   | # |   |
| Ot            | C  |    |             |          |   |   |
| ##            |    |    |             |          |   |   |
| ## pair_coeff | 5  | 6  | 0.206155281 | 3.4068   | # |   |
| S             | N  |    |             |          |   |   |
| ## pair_coeff | 5  | 7  | 0.165378354 | 3.48165  |   |   |
| #             | S  | C3 |             |          |   |   |
| ## pair_coeff | 5  | 8  | 0.12349089  | 3.3409   | # |   |
| S             | F  |    |             |          |   |   |
| ## pair_coeff | 5  | 9  | 0.146543509 | 3.48165  |   |   |
| #             | S  | C  |             |          |   |   |

```

##
## pair_coeff      6      7      0.136374484      3.32485
#      N      C3
## pair_coeff      6      8      0.101833197      3.1841      #
#      N      F
## pair_coeff      6      9      0.120842873      3.32485
#      N      C
##
## pair_coeff      7      8      0.081690881      3.25895
#      C3      F
## pair_coeff      7      9      0.096940497      3.3997      #
#      C3      C
##
## pair_coeff      8      9      0.072387154      3.25895
#      F      C
##
## -----

```

## 2. Example of LAMMPS input file for LiCl simulations

# LAMMPS input script

units real  
dimension 3  
boundary p p p

atom\_style full  
bond\_style harmonic  
angle\_style harmonic

##----- Force field -----##

pair\_style lj/cut/tip4p/long 1 2 1 1 0.1546 12.0  
pair\_modify table 0  
pair\_modify tabinner/disp 10  
pair\_modify tail yes  
kspace\_style ppm/tip4p 1.0e-4  
comm\_modify cutoff 15.5

##----- Build configuration -----##

region box block 0 50 -400 501 0 33  
region liq1 block 0 50 -100 0 0 33  
region liq2 block 0 50 101 201 0 33

create\_box 5 box &  
bond/types 1 &  
angle/types 1 &  
extra/bond/per/atom 2 &  
extra/angle/per/atom 1 &  
extra/special/per/atom 2 &

bond\_coeff 1 450 0.9572  
angle\_coeff 1 55 104.52

molecule water tip3p.mol # this uses the TIP3P geometry

create\_atoms 0 random 5388 34564 liq1 mol water 25367 overlap 1.33  
create\_atoms 3 random 100 52802 liq1 overlap 1 maxtry 500  
create\_atoms 4 random 100 90182 liq1 overlap 1 maxtry 500

create\_atoms 0 random 5388 34564 liq2 mol water 25367 overlap 1.33  
create\_atoms 3 random 100 52802 liq2 overlap 1 maxtry 500  
create\_atoms 4 random 100 90182 liq2 overlap 1 maxtry 500

read\_data channel.data add append offset 4 0 0 0 0  
read\_data channel.data add append offset 4 0 0 0 0 shift 0 0 22.5

##----- Set mass for atom -----##

mass 1 15.9994 # O  
mass 2 1.008 # H  
mass 3 6.94100 # Li  
mass 4 35.4530 # Cl  
mass 5 12.0707 # C

##----- must change charges for TIP4P -----##

#  
set type 1 charge -1.1128  
set type 2 charge 0.5564  
set type 3 charge 0.85  
set type 4 charge -0.85  
set type 5 charge 0

##----- Pair coeff -----##

pair\_coeff 1 1 0.18520 3.15890 # O  
pair\_coeff 2 \* 0.00000 0.00000 # H  
pair\_coeff 3 3 0.10399 1.43970 # Li  
pair\_coeff 4 4 0.01834 4.69906 # Cl  
pair\_coeff 5 5 0.00000 0.00000 # C 0.08590 3.3997

pair\_coeff 1 5 0.11434 3.27500 # O C werder  
pair\_coeff 1 3 0.16746 2.12000 # O Li  
pair\_coeff 1 4 0.01481 4.23867 # O Cl

pair\_coeff 3 4 0.30663 2.70000 # Li Cl  
pair\_coeff 3 5 0.09451 2.41955 # C Li  
pair\_coeff 4 5 0.03969 4.04938 # C Cl

##----- Set group name -----##

group Ox type 1  
group Hy type 2  
group Li type 3  
group Cl type 4  
group gra type 5

group H2O type 1 2  
group ele type 1 2 3 4

##----- Energy minimization -----##

fix freeze gra setforce 0.0 0.0 0.0  
thermo 10

```

minimize 1.0e-4 1.0e-5 300 1000
write_data liclchannel1m.data

# ----- Initi Vel -----##

velocity ele create 300 944588317
velocity ele zero linear
velocity ele zero angular

##----- Run NVT at 298.15K correct every 200 timestep -----##
##----- shake to fix bond and angle -----##

##----- Run NVT at 298.15K correct every 200 timestep -----##
##----- shake to fix bond and angle -----##

region          channel block 0 50 0 100.6 10.2 22.5

variable Nh2o   equal count(H2O,channel)
variable Nli    equal count(Li,channel)
variable Ncl    equal count(Cl,channel)

fix myat1 all ave/time 10 100 1000 v_Nh2o file H2O.dat
fix myat2 all ave/time 10 100 1000 v_Nli  file Nli.dat
fix myat3 all ave/time 10 100 1000 v_Ncl  file NCl.dat

timestep        2      #2fs
dump            mydmp all atom 1000 md.lammpstrj
compute        eletemp ele temp

thermo          1000
thermo_style    custom step c_eletemp pe press vol ly density v_Nh2o v_Nli v_Ncl
fix            freeze gra setforce 0.0 0.0 0.0
fix            myshk H2O shake 1.0e-5 200 0 b 1 a 1
fix            mynvt ele nvt temp 298.15 298.15 400
fix            balance all balance 10000 1.05 shift y 10 1.05
fix            moment all momentum 1 linear 1 1 1 rescale

restart         500000 restart/restart.*.equil
run            15000000 # 30ns

write_data      LiCl1Mequ.data nocoeff

##-----change the parameters for NaCl setup-----##
##                                     ##
## mass 3 22.98977 # Na                                     ##

```

```

##                                     ##
## #----- Pair coeff -----##
##                                     ##
## pair_coeff      1 1 0.18520 3.15890 # O          ##
## pair_coeff      2 * 0.00000 0.00000 # H          ##
## pair_coeff      3 3 0.35190 2.21737 # Na         ##
## pair_coeff      4 4 0.01834 4.69906 # Cl         ##
## pair_coeff      5 5 0.00000 3.3997 # C 0.08590 3.3997 ##
##                                     ##
##                                     ##
## pair_coeff      1 5 0.11434 3.27500 # O C werder ##
## pair_coeff      1 3 0.18962 2.60838 # O Na       ##
## pair_coeff      1 4 0.01481 4.23867 # O Cl       ##
##                                     ##
## pair_coeff      3 4 0.34390 3.00512 # Na Cl      ##
## pair_coeff      3 5 0.09451 2.41955 # C Na      ##
## pair_coeff      4 5 0.03969 4.04938 # C Cl      ##
##-----##

```
